1 **Association of *Prevotella* enterotype with polysomnographic data in obstructive**  
2 **sleep apnea/hypopnea syndrome patients**

3

4 **Running Title: Various enterotypes in OSAHS**

5

6 **Chih-Yuan Ko<sup>a,b,c,d,\*#</sup>, Ji-Mim Fan<sup>a,b,\*</sup>, An-Ke Hu<sup>a,b,\*</sup>, Li-Mei Huang<sup>a,b</sup>,**  
7 **Huan-Zhang Su<sup>a,b</sup>, Jiao-Hong Yang<sup>a,b</sup>, Hua-Ping Zhang<sup>a,b,#</sup>, Yi-Ming Zeng<sup>a,b,#</sup>**

8

9 \*These authors have contributed equally to this work.

10 <sup>#</sup>Ko, Zeng, and Zhang are co-corresponding authors, have contributed equally to this  
11 work.

12 <sup>a</sup>Department of Pulmonary and Critical Care Medicine, the Second Affiliated Hospital  
13 of Fujian Medical University, Quanzhou, China, 362000.

14 <sup>b</sup>Respiratory Medicine Center of Fujian Province, Quanzhou, China, 362000.

15 <sup>c</sup>Clinical Center for Molecular Diagnosis and therapy, the Second Affiliated Hospital  
16 of Fujian Medical University, Quanzhou, China, 362000.

17 <sup>d</sup>Department of Endocrinology and Metabolism, the Second Affiliated Hospital of  
18 Fujian Medical University, Quanzhou, China, 362000.

19

20 **Corresponding author:**

21 **Chih-Yuan Ko.** The Second Affiliated Hospital of Fujian Medical University, No. 34,

22 Zhongshanbei Rd, Licheng District, Quanzhou, Fujian Province, China, 362000. Tel.:

23 +86 0595-68196777. E-mail address: yuanmomoko@gmail.com

24 **Yi-Ming Zeng.** The Second Affiliated Hospital of Fujian Medical University, No. 34,

25 Zhongshanbei Rd, Licheng District, Quanzhou, Fujian Province, China, 362000. Tel.:

26 +86 0595-68196777. E-mail address: zeng\_yi\_ming@126.com

27 **Abstract**

28 Intermittent hypoxia and sleep fragmentation are critical pathophysiological  
29 processes involved in obstructive sleep apnea/hypopnea syndrome (OSAHS). These  
30 manifestation independently affect similar brain regions and contribute to  
31 OSAHS-related comorbidities that are known to be related to the host gut alteration  
32 microbiota. We hypothesized that microbiota disruption influences the  
33 pathophysiological processes of OSAHS through a microbiota–gut–brain axis. Thus,  
34 we aim to survey enterotypes and polysomnographic data of OSAHS patients.  
35 Subjects were diagnosed by polysomnography, from whom fecal samples were  
36 obtained and analyzed for the microbiome composition by variable regions 3–4 of  
37 16S rRNA pyrosequencing and bioinformatic analyses. We examined blood  
38 cytokines level of all subjects. Three enterotypes *Bacteroides* (n=73), *Ruminococcus*  
39 (n=14), and *Prevotella* (n=26) were identified. Central apnea indices, mixed apnea  
40 indices, N1 sleep stage, mean apnea–hypopnea duration, and arousal indices were  
41 increased in apnea–hypopnea indices (AHI)  $\geq 15$  patients with the *Prevotella*  
42 enterotype. However, for AHI $<15$  subjects, obstructive apnea indices and systolic  
43 blood pressure were significantly observed in *Ruminococcus* and *Prevotella*  
44 enterotypes, respectively. The present study indicates the possibility of  
45 pathophysiological interplay between enterotypes and sleep structure disruption in  
46 sleep apnea through a microbiota–gut–brain axis and offers some new insight toward  
47 the pathogenesis of OSAHS.

48 **Key Words:** central apnea indices, enterotypes, microbiota, polysomnography,

49 obstructive sleep apnea/hypopnea syndrome

50 **Importance**

51 Intermittent hypoxia (IH) and sleep fragmentation (SF) are hallmarks of are the  
52 predominant mechanism underlying obstructive sleep apnea/hypopnea syndrome  
53 (OSAHS). Moreover, IH and SF of pathophysiological roles in the gut microbiota  
54 dysbiosis in OSAHS have been demonstrated. We hypothesized that gut microbiota  
55 disruption may cross-talk the brain function via microbiota–gut–brain axis. Indeed,  
56 we observed central apnea indices and other parameters of disturbances during sleep  
57 were significantly elevated in  $AHI \geq 15$  patients with the *Prevotella* enterotype. This  
58 enterotype prone to endotoxin production, driving systemic inflammation, ultimately  
59 contributes to OSAHS-linked comorbidities. Vice versa, increasing the arousal index  
60 leads to systemic inflammatory changes and accompanies metabolic dysfunction. We  
61 highlight that the possibility that the microbiota–gut–brain axis operates a  
62 bidirectional effect on the development of OSAHS pathology.

## 63 **Introduction**

64 Intermittent hypoxia (IH) and sleep fragmentation (SF) are hallmarks of  
65 obstructive sleep apnea/hypopnea syndrome (OSAHS) [1-3]. IH plays a critical  
66 pathophysiological role in of OSAHS, often accompanied by reduced oxygen  
67 saturation, increased systemic pressure and bloodstream, excessive sympathetic neural  
68 activity, impairment of autonomic function and apnea episodes end with an arousal of  
69 the central nervous system (CNS), ultimately result in vascular endothelial  
70 dysfunction and multi-organ morbid consequences. The underlying mechanism  
71 involves inflammation and oxidative stress cascades [4,5].

72 Contrastingly, sleep structure disruption is another risk factor for the  
73 pathophysiology of OSAHS, causing major end-organ morbidity independent of IH  
74 [6,7]. Repeated arousals disturbing different stages of sleep are the predominant  
75 mechanism underlying OSAHS-induced brain injury wherein results from disruptions  
76 of rapid eye movement (REM) and non-REM (NREM) [7]. Even disturbances in sleep  
77 continuity are associated with emotional disorders [8]. SF promotes obesity and  
78 metabolic abnormalities and may be mediated by concurrent alterations of the host gut  
79 microbiota and concurrent systemic and adipose tissue inflammatory alterations  
80 accompanied by insulin resistance [3,9]. Prolongation of the N1 stage and shortening  
81 of REM times were observed in OSAHS-induced hypertension patients. Reportedly,  
82 prolongation of the N1 sleep stage causes elevation of fasting blood glucose [10].  
83 Elevated serum lipopolysaccharide (LPS)-binding protein levels might prolong the N1  
84 stage and increase SF, which may be related to increased nighttime respiratory events

85 and arousals [10]. Interestingly, the disturbance of sleep structure also contributes to  
86 mild cognitive decline in OSAHS [7]. However, treating OSAHS patients with  
87 continuous positive airway pressure (CPAP) has protective effects on neurocognition,  
88 and it has been postulated that the microbiota can be modulated during CPAP  
89 treatment [11], implying that the microbiota might participate in the  
90 pathophysiological developed mechanism.

91 Emerging evidence suggests that the gut microbiota play a crucial role in  
92 modulating the risk of several chronic diseases and maintaining intestinal immunity  
93 and whole body homeostasis. These effects have important implications for diseases  
94 such as obesity, cardiometabolic abnormalities, inflammatory bowel disease (IBD),  
95 and mental illness [12]. Additionally, the gut microbiota alterations manifested in IH  
96 and FS mimic in OSAHS animal models [1,3]. However, some of the underlying  
97 mechanisms of OSAHS-related comorbidities remain unclear. Enterotype analysis has  
98 been proposed as a useful method to understand human gut microbial communities,  
99 including *Bacteroides*, *Ruminococcus*, and *Prevotella* enterotypes, irrespective of  
100 ethnicity, gender, age or body mass index (BMI) [13]. Moreover, enterotypes  
101 subdivision provides an attractive framework for linking human disease. For example,  
102 *Bacteroides* enterotype has been reported to pose an increased risk for IBD [14-16].

103 Notably, the characteristics of IH and SF in OSAHS can trigger the inflammatory  
104 response, which then alters the intestinal microbial community composition [1,3,9].  
105 Conversely, gut microbiomes can also respond to the brain via the microbiota–gut–  
106 brain axis, as has been reported in psychiatric disorders [17,18]. However, this

107 hypothesis has not been verified for OSAHS. Thus, the present study tested the  
108 hypothesis that the microbiota–gut–brain axis is involved in the pathogenesis of  
109 OSAHS. We examined whether impaired sleep architecture is associated with gut  
110 microbiota alteration by investigating sleep parameters of polysomnography (PSG)  
111 data and pro-inflammatory cytokines in various enterotypes of OSAHS subjects.

112

## 113 **Results**

### 114 **Patient characteristics and enterotype distribution**

115 We enrolled 113 patients (61, AHI<15; 52, AHI≥15). Patients were divided  
116 according to three enterotypes: *Bacteroides* (n=73), *Ruminococcus* (n=14), and  
117 *Prevotella* (n=26) (Figure 1). The ages of the *Ruminococcus* enterotype patients were  
118 significantly higher than those of the *Bacteroides* enterotype patients (Table 1). BMI  
119 and hip circumference of the *Prevotella* enterotype patients were significantly higher  
120 than those of the *Bacteroides* enterotype patients (Table 1).

121

### 122 **PSG parameter analysis**

123 Comparisons among patients with different enterotypes showed that central apnea  
124 times, mixed apnea index, and mixed apnea times were the highest in the *Prevotella*  
125 enterotype patients (Table 2).

126 Using 15 as the AHI cut-off, when AHI≥15, N1 sleep stage, arousal time in REM,  
127 arousal index in REM, arousal time in NREM, total sleep arousal times, total sleep  
128 arousal index, central apnea times, mixed apnea index, and mixed apnea times were

129 the highest in the *Prevotella* enterotype patients. Contrastingly, sleep latency and  
130 arousal time were the lowest in the *Prevotella* enterotype patients (Table 3). When  
131  $AHI < 15$ , obstructive apnea index and obstructive apnea times were the highest in the  
132 *Ruminococcus* enterotype subjects, the highest and average systolic BP were the  
133 highest in the *Prevotella* enterotype subjects (Table 4).

134 We used individual enterotypes for comparison due to the effects of  
135 *Ruminococcus* and *Prevotella* enterotypes on PSG. For *Ruminococcus* enterotype  
136 patients, AHI, apnea-hypopnea times, oxygen desaturation index, highest systolic  
137 blood pressure (BP), and average systolic BP were all significantly elevated in  
138  $AHI \geq 15$  patients (Table 5).

139 For *Prevotella* enterotype patients, N1 sleep stage, N3 sleep stage, arousal index  
140 in REM, arousal time in NREM, arousal index in NREM, total sleep arousal times,  
141 total sleep arousal index, AHI, apnea-hypopnea times, obstructive apnea index,  
142 obstructive apnea times, central apnea index, mixed apnea index, hypopnea index,  
143 hypopnea times, longest apnea time, mean apnea-hypopnea duration (MAD), longest  
144 hypopnea time, average hypopnea time, oxygen desaturation index, and mean heart  
145 rate were significantly elevated in  $AHI \geq 15$  patients. However, sleep latency, arousal  
146 time, lowest oxygen saturation, and average oxygen saturation were significantly  
147 decreased in  $AHI \geq 15$  patients (Table 6).

148

#### 149 **Cytokine analysis**

150 There were not significantly different in IL-6 and TNF- $\alpha$  among three



151 enterotypes patients (Figure 2).

152

## 153 **Discussion**

154 OSAHS is a systemic and comprehensive disorder associated with comorbidities,  
155 including cardiovascular disease, metabolic abnormalities, and neuropsychiatric and  
156 neurodegenerative disorders [4,5,7,9]. Thus, the IH mechanism alone is insufficient to  
157 interpret the complete pathogenesis of OSAHS because OSAHS is also affected by  
158 several other aspects, including the CNS. This study shows that central apnea indices  
159 are significantly elevated in  $AHI \geq 15$  patients with the *Prevotella* enterotype,  
160 accompanied other parameters of disturbances in sleep. However, for  $AHI < 15$  results,  
161 changes in obstructive apnea indices and systolic BP are the remarkable observations  
162 in *Ruminococcus* enterotype and *Prevotella* enterotype subjects, respectively.

163 *Bacteroides* enterotype is associated with Western-style diets, including  
164 consuming high amounts of protein and fat. *Prevotella* enterotype is associated with  
165 diets high in carbohydrates (fiber) and simple sugars, whereas *Ruminococcus* species  
166 enterotype is linked to non-digestible carbohydrates [14]. Despite the fact that the  
167 *Bacteroides* predominant enterotype seems to be more common in IBD patients, the  
168 *Prevotella* enterotype is more representative in healthy subjects [15,16]. Our findings  
169 show that *Bacteroides* enterotype patients are not susceptible to OSAHS, in contrast to  
170 the susceptibility of *Prevotella* and *Ruminococcus* enterotype patients.

171 IH-exposed mice mimic OSAHS, causing profound alterations in gut microbiota.  
172 Hypoxia/re-oxygenation is the most pronounced [1], inducing an alteration in

173 intestinal epithelial barrier markers and increasing intestinal permeability, leading to  
174 local and systemic inflammatory responses and consequent multi-organ morbidities  
175 [20,21]. However, only *Bacteroides* and *Prevotella* enterotypes can be classified in the  
176 rodent model, IH-exposed mice classify as the *Prevotella* enterotype [1], who is  
177 similar to our particularly OSAHS patients. It has also been shown that IH leads to gut  
178 microbiota alteration and accompanying endotoxin production [22]. It is that IH model  
179 creates an anoxic environment in the intestine, which is beneficial for obligate  
180 anaerobic bacterial growth, endogenous LPS production from gram-negative bacteria,  
181 and triggering inflammation. Notably, *Prevotella* is a genus of gram-negative  
182 anaerobic bacteria, and it tends to alter intestinal permeability [1,2]. Although this  
183 evidence only reveals the IH contribution to the pathogenesis, we speculated that SF  
184 is another principal contributor [3]. SF-induced mice manifest inflammation and  
185 enhanced production of endotoxins produced by gut microbiota, too [3]. In  
186 middle-aged nonobese males with OSAHS, disruption of the intestinal barrier and  
187 concurrent increased serum d-lactate levels possibly contribute to intestinal  
188 hyperpermeability and are significantly positively associated with IL-1 $\beta$ , IL-6, and  
189 TNF- $\alpha$  in serum [19] in which TNF- $\alpha$  elevation in *Prevotella* enterotype subjects is  
190 similar with our results, but it did not reach statistically significant differences.  
191 Moreover, LPS may play a key role in driving systemic inflammation, it has been  
192 shown in IH and SF modeling OSAHS models [1-3].

193 *Prevotella* enterotype patients with AHI $\geq$ 15 in our results, suggesting that LPS  
194 production triggers downstream signaling pathways, leading to the subsequent release

195 of pro-inflammatory IL-1 $\beta$ , IL-6, and TNF- $\alpha$  cytokines [23]. Furthermore, the  
196 elevation of LPS-binding protein [19] is also verified in OSAHS, mimicking rodent  
197 models [3] and patients [19], particularly regarding in the higher d-lactate level of  
198 OSAHS patients. Inflammatory mediators can be produced by peripheral and central  
199 cells. Peripheral inflammatory mediators may invade the CNS by crossing the blood–  
200 brain barrier, affecting behaviors and causing metabolic problems and psychiatric  
201 disorders [24]. Here, our data suggest that the gut microbiota impact the brain in  
202 OSAHS patients by modulating inflammatory responses. Additionally, we should  
203 mention that the *Prevotella* enterotype is linked to diets rich in simple sugars. Simple  
204 carbohydrate consumption has been hypothesized to be related to elevated BP values  
205 and obesity [25], as shown in our data. *Prevotella* enterotype patients had a higher  
206 BMI and hip circumference than *Bacteriodes* enterotype patients. Monosaccharide  
207 intake induces inflammation in epithelial cells and contributes to hypertension [25],  
208 linking to LPS production, which can stimulate systemic inflammatory cascades [1].  
209 Inflammation mediates the pathogenesis of many physiological dysfunctions, such as  
210 metabolic syndrome and mental dysfunction [24], and thus might ultimately result in  
211 OSAHS-related metabolic comorbidities. Although *Ruminococcus* is associated with  
212 resistant starch, host health benefits from short chain fatty acids that have been  
213 demonstrated to regulate immune inflammatory responses [26]. The enriched bacteria  
214 *Ruminococcus* spp. and *Sutterella* spp. are found in autism spectrum disorder patients  
215 [27]. The abovementioned literature supports the hypothesis that microbiota

216 disruption influences the pathophysiological process of OSAHS through a  
217 microbiota–gut–brain axis.

218 Although OSAHS is one of the most common sleep apnea syndromes (SAS),  
219 other types are mixed sleep apnea (MSA) and central sleep apnea (CSA). The  
220 prevalences of OSAHS, complex SAS (CompSAS), and central SAS are 84.0%,  
221 15.0%, and 0.4%, respectively [28]. MSA generally describes the mixture of both  
222 obstructive and central apnea events during diagnostic sleep, although many central  
223 apnea index occurrence is also identified as MSA, which is sometimes referred to as  
224 CompSAS [29]. Whereas CompSAS is a form of CAS wherein the persistence or  
225 emergence of central apneas or hypopneas have disappeared with CPAP, patients have  
226 predominately obstructive or mixed apneas occurring at  $\geq 5$  events/h [30]. Additionally,  
227 reportedly, there is a high prevalence of hypertension and heart disease in patients  
228 with CompSAS [31]. In our data, the central apnea index and mixed apnea index were  
229 significantly increased in *Prevotella* enterotype patients with  $AHI \geq 15$ . Thus,  
230 abnormalities in electrocardiography, electroencephalography, electromyography, and  
231 electro-oculography results should be of more concern.

232 Both IH and SF have been shown to independently affect similar CNS regions in  
233 animal research [7]. The N1 sleep stage is associated with the transition from  
234 wakefulness to other sleep stages or the following arousal during sleep. A higher N1  
235 percentage might mean more events of wakefulness and/or arousal, SF (episodic  
236 arousal from sleep), and sympathetic overactivity during sleep [10]. REM sleep  
237 dysregulation significantly contributes to cognitive distortions and dysfunctions that

238 rely on emotion and memory functions are also affected [8]. Moreover, the effects of  
239 sleep deprivation on cognition have been investigated [32]. Thus, OSAHS patients  
240 have been found to have neurocognitive and emotional disorders, suggesting the  
241 modulation of various neurotransmitters during the sleep period [7]. Recently, a  
242 multicenter randomized controlled trial has been initiated evaluating the extent to  
243 which CPAP treatment improves neurocognitive dysfunction in OSAHS patients and  
244 examining the role of gut microbiota in this change [11]. Preliminary results suggest  
245 the viability of the hypothesis that microbiota modulate central nervous functions in  
246 OSAHS patients.

247       Although the neural mechanisms underlying SAS-induced brain injury have not  
248 been completely elucidated, repeated arousals enable the characterization of the  
249 different stages of sleep. In the present study, the N1 sleep stage, MAD, and arousal  
250 index were increased in *Prevotella* enterotype patients. BP was not significantly  
251 different among the three enterotype  $AHI \geq 15$  patient groups, but mean diastolic  
252 pressure during sleep was  $>80$  mmHg, which was similar to that observed in a  
253 previous study [10]. MDA can act as an indicator of the levels of sleep parameters and  
254 blood oxygenation for the evaluation of severe OSAHS patients [33]. When MAD is  
255 elevated, sleep apnea appears to be more likely to cause respiratory arousal and might  
256 impair sleep stability, resulting in SF. This outcome might then be that the transition  
257 of the N2 sleep stage (the longest stage of sleep) to the N3 sleep stage is a vulnerable  
258 period, which is interrupted in OSAHS patients, and the overall sleep pattern becomes  
259 light sleep [33]. Additionally, chronic SF induction elevates fat mass, alters fecal

260 microbiota, promotes increased gut permeability, leads to systemic and adipose tissue  
261 inflammatory changes, and accompanies metabolic dysfunction [3]. These symptoms  
262 are known to be associated with OSAHS-related metabolic comorbidities, implying  
263 that the microbiota–gut–brain axis has a biaxial effect on the development of OSAHS  
264 pathology.

265 Contrastingly, evidence has shown that N1, N3, and REM sleep stages decrease  
266 and the N2 sleep stage increases in OSAHS patients [7]. However, a higher N1  
267 percentage, a longer MAD, and a shortened REM sleep stage were revealed in  
268  $AHI \geq 15$  patients with OSAHS-induced hypertension [10,33]. Our findings reveal that  
269 BP plays a vital role, particularly for SAS, where BP is comprehensively regulated by  
270 the peripheral and central systems. Hence, future studies should re-examine these  
271 questions in subgroups of hypertensive and normotensive OSAHS patients to assess  
272 their general applicability.

273 The current study initiates a new approach to the study of sleep apnea through a  
274 combination of polysomnographic measurements with analysis of gut microbiota.  
275 Central apnea index, mixed apnea index, N1 sleep stage, MAD, and arousal indices  
276 were all increased in  $AHI \geq 15$  patients with the *Prevotella* enterotype. Our results raise  
277 the possibility that the microbiota–gut–brain axis operates bidirectionally, with  
278 significant impact on the pathogenesis of OSAHS including functions of the gut and  
279 brain that eventually contribute to multiple end-organ morbidities.

280

281 **Materials and Methods**

## 282 **Subjects**

283 In total, 113 subjects were recruited and examined during a full night of PSG  
284 (SOMNOscreen™ plus PSG<sup>+</sup>; SOMNOmedics GmbH, Randersacker, Germany) by  
285 technologists in a sleep laboratory from 10 PM to 8 AM at the Department of  
286 Pulmonary and Critical Care Medicine. Fecal samples were collected the following  
287 morning. The Institutional Review Board of the Second Affiliated Hospital of Fujian  
288 Medical University approved this study (IRB No. 2017-78).

289

## 290 **OSAHS evaluation**

291 All the subjects underwent PSG with a computerized polysomnographic system,  
292 simultaneously including electrocardiography, electroencephalography,  
293 electromyography, and electrooculography. After one night of examination, AHI were  
294 calculated as the total number of episodes of apnea (continuous cessation of airflow  
295 for at least 10 s) and hypopnea (reduction in airflow for  $\geq 10$  s with oxygen  
296 desaturation  $\geq 4\%$ ) by dividing the total sleep by events, according to the diagnostic  
297 criteria of the American Academy of Sleep Medicine. AHI $<15$  events/h was defined  
298 as non-OSAHS and AHI $\geq 15$  events/h as OSAHS in this study, as reported previously  
299 [10,19].

300

## 301 **Cytokine analysis**

302 IL-6 and TNF- $\alpha$  were assayed by BD Human Enhanced Sensitivity Cytometric  
303 Bead Array Kit (BD Biosciences, New Jersey, USA) as described previously [18].  
304 The standard coefficient of determination ( $r^2$ ) was greater than 0.995.

305

### 306 **Sampling, DNA extraction, and 16S rRNA gene amplification sequencing**

307 Samples were collected and stored in a Microbiome Test Kit (G-BIO Biotech,  
308 Inc., Hangzhou, China). Magnetic bead isolation was performed to extract genomic  
309 DNA using a TIANamp stool DNA kit (TIANGEN Biotech Co., Ltd., Beijing, China),  
310 according to the manufacturer's instructions. The concentration of extracted DNA was  
311 determined by a Nanodrop ND-1000 spectrophotometer (Thermo Electron  
312 Corporation, USA), and DNA quality was confirmed using 1.0% agarose gel  
313 electrophoresis with 0.5 mg/mL ethidium bromide.

314 Isolated fecal DNA was used as a template to amplify the V3 and V4  
315 hypervariable regions of the bacterial 16S ribosomal RNA gene. The V3 and V4  
316 regions were PCR-amplified (forward primer, 5'-ACTCCTACGGGAGGCAGCAG-3';  
317 reverse primer, 5'-GGACTACHVGGGTWTCTAAT-3'). The 16S target-specific  
318 sequence contained adaptor sequences permitting uniform amplification of a highly  
319 complex library ready for downstream next-generation sequencing on Illumina MiSeq  
320 (Illumina, USA). Negative DNA extraction controls (lysis buffer and kit reagents only)  
321 were amplified and sequenced as contamination controls. The amplicons were  
322 normalized, pooled, and sequenced on the Illumina MiSeq platform using a V3  
323 reagent kit with  $2 \times 300$  cycles per sample and with imported and prepared routine



324 data (samsheet) run in the MiSeq sequence program. After sequencing, Q30 scores  
325 were  $\geq 70\%$ , the percentage of clusters passing filter (i.e., cluster PF) was  $\geq 80\%$ , and  
326 there were at least 30,000 clean tags. Finally, image analysis and base calling were  
327 conducted with MiSeq Control Software.

328

### 329 **Bioinformatic, predictive function and statistical analyses**

330 Based on the Quantitative Insights into Microbial Ecology bio-informatic pipeline  
331 for performing taxonomy assignment by the operational taxonomic unit method, we  
332 used data of 113 sequences to analyze the fecal microbiota taxa. We analyzed  
333 differences in gut microbiota using the Wilcoxon test, as appropriate, and performed  
334 principal coordinate analysis on the basis of the Bray–Curtis distance function, using  
335 R statistics. We performed other analyses using statistically with SPSS version 19.0  
336 (SPSS Inc., Chicago, IL, USA); data were analyzed by *t*-test or one-way ANOVA,  
337 followed by Scheffe post hoc analyses. We considered a two-sided *p* value of  $<0.05$  to  
338 be statistically significant.

339 **Declarations**

340 **Conflict of interest**

341 The authors declare that they have no financial and personal relationships with  
342 others that may inappropriately influence the results and interpretation in this  
343 manuscript.

344

345 **Role of the funding source**

346 None.

347

348 **Contributors**

349 Conception and design: CYK, HPZ, YMZ

350 Acquisition of data: CYK, AKH, JMF, LMH, JHY, HZS

351 Analysis and interpretation of data: CYK, AKH, JMF, HPZ, YMZ

352 Drafting or revising of the article: CYK, HPZ, YMZ

353 Final approval of the manuscript: All authors read and approved the final manuscript

354

355 **Acknowledgments**

356 We thank all the participants and their family who took part in this study. The  
357 authors appreciate for Huan Wu (G-BIO Biotech, Inc., Hangzhou, China) assist us to  
358 carry out the bioinformatic analysis. The authors would like to thank the Fujian  
359 Provincial Health and Family Planning Commission, China, under contract No.  
360 2018-CX-36; the Fujian Province Science and Technology Project, China, under

361 contract No. 2018J01290; the Quanzhou Science and Technology Project, China,  
362 under contract No. 2017Z016 and No. 2018Z107. This article was also subsidized by  
363 academic funding from the Second Affiliated Hospital of Fujian Medical University  
364 (serial No. BSH001).

365 **References**

- 366 1. Moreno-Indias I, Torres M, Montserrat JM, Sanchez-Alcoholado L, Cardona F,  
367 Tinahones FJ, Gozal D, Poroyko VA, Navajas D, Queipo-Ortuño MI, Farré R.  
368 2015. Intermittent hypoxia alters gut microbiota diversity in a mouse model of  
369 sleep apnoea. *Eur Respir J* 45(4):1055–1065.
- 370 2. Moreno-Indias I, Torres M, Sanchez-Alcoholado L, Cardona F, Almendros I,  
371 Gozal D, Montserrat JM, Queipo-Ortuño MI, Farré R. 2016. Normoxic recovery  
372 mimicking treatment of sleep apnea does not reverse intermittent  
373 hypoxia-induced bacterial dysbiosis and low-grade endotoxemia in mice. *Sleep*  
374 39(10):1891-1897.
- 375 3. Poroyko VA, Carreras A, Khalyfa A, Khalyfa AA, Leone V, Peris E, Almendros I,  
376 Gileles-Hillel A, Qiao Z, Hubert N, Farré R, Chang EB, Gozal D. 2016. Chronic  
377 sleep disruption alters gut microbiota, induces systemic and adipose tissue  
378 inflammation and insulin resistance in mice. *Sci Rep* 6:35405.
- 379 4. Lavie L. 2015. Oxidative stress in obstructive sleep apnea and intermittent  
380 hypoxia-revisited-the bad ugly and good: implications to the heart and brain.  
381 *Sleep Med Rev* 20:27-45.
- 382 5. Gaspar LS, Álvaro AR, Moita J, Cavadas C. 2017. Obstructive Sleep Apnea and  
383 Hallmarks of Aging. *Trends Mol Med* 23(8):675-692.
- 384 6. Rosenzweig I, Williams SC, Morrell MJ. 2013. Cross Talk opposing view: the  
385 intermittent hypoxia attending severe obstructive sleep apnoea does not lead to  
386 alterations in brain structure and function. *J Physiol* 591(2):383-385.

- 387 7. Rosenzweig I, Williams SC, Morrell MJ. 2014. The impact of sleep and hypoxia  
388 on the brain: potential mechanisms for the effects of obstructive sleep apnea. *Curr*  
389 *Opin Pulm Med* 20(6):565-571.
- 390 8. Palagini L, Baglioni C, Ciapparelli A, Gemignani A, Riemann D. 2013. REM  
391 sleep dysregulation in depression: state of the art. *Sleep Med Rev* 17(5):377-390.
- 392 9. Farré N, Farré R, Gozal D. Sleep Apnea Morbidity: A Consequence of  
393 Microbial-Immune Cross-Talk? *Chest* 2108 [Epub ahead of print].
- 394 10. Shao L, Heizhati M, Yao X, Wang Y, Abulikemu S, Zhang D, Zhou L, Hong J, Li  
395 N. 2018. Influences of obstructive sleep apnea on blood pressure variability might  
396 not be limited only nocturnally in middle-aged hypertensive males. *Sleep Breath*  
397 22(2):377-384.
- 398 11. Xu H, Wang H, Guan J, Yi H, Qian Y, Zou J, Xia Y, Fu Y, Li X Jiao X, Huang H,  
399 Dong P, Yu Z, Yang J, Xiang M, Li J, Chen Y, Wang P, Sun Y, Li Y, Zheng X, Jia  
400 W, Yin S. 2017. Effects of continuous positive airway pressure on neurocognitive  
401 architecture and function in patients with obstructive sleep apnoea: study protocol  
402 for a multicentre randomised controlled trial. *BMJ Open* 7(5):e014932.
- 403 12. Singh RK, Chang HW, Yan D, Lee KM, Ucmak D, Wong K, Abrouk M, Farahnik  
404 B, Nakamura M, Zhu TH, Bhutani T, Liao W. 2017. Influence of diet on the gut  
405 microbiome and implications for human health. *J Transl Med* 15(1):73.
- 406 13. Arumugam M, Raes J, Pelletier E, Le Paslier D, Yamada T, Mende DR,  
407 Fernandes GR, Tap J, Bruls T, Batto JM, Bertalan M, Borruel N, Casellas F,  
408 Fernandez L, Gautier L, Hansen T, Hattori M, Hayashi T, Kleerebezem M,

409 Kurokawa K, Leclerc M, Levenez F, Manichanh C, Nielsen HB, Nielsen T, Pons  
410 N, Poulain J, Qin J, Sicheritz-Ponten T, Tims S, Torrents D, Ugarte E, Zoetendal  
411 EG, Wang J, Guarner F, Pedersen O, de Vos WM, Brunak S, Doré J; MetaHIT  
412 Consortium, Antolín M, Artiguenave F, Blottiere HM, Almeida M, Brechot C,  
413 Cara C, Chervaux C, Cultrone A, Delorme C, Denariáz G, Dervyn R, Foerstner  
414 KU, Friss C, van de Guchte M, Guedon E, Haimet F, Huber W, van  
415 Hylckama-Vlieg J, Jamet A, Juste C, Kaci G, Knol J, Lakhdari O, Layec S, Le  
416 Roux K, Maguin E, Mérieux A, Melo Minardi R, M'rini C, Muller J, Oozeer R,  
417 Parkhill J, Renault P, Rescigno M, Sanchez N, Sunagawa S, Torrejon A, Turner K,  
418 Vandemeulebrouck G, Varela E, Winogradsky Y, Zeller G, Weissenbach J, Ehrlich  
419 SD, Bork P. 2011. Enterotypes of the human gut microbiome. *Nature*  
420 473(7346):174-180.

421 14. Conlon MA, Bird AR. 2015. The impact of diet and lifestyle on gut microbiota  
422 and human health. *Nutrients* 7(1):17-44.

423 15. Knights D, Ward TL, McKinlay CE, Miller H, Gonzalez A, McDonald D, Knight  
424 R. 2014. Rethinking "enterotypes". *Cell Host Microbe* 16(4):433-437.

425 16. Costea PI, Hildebrand F, Arumugam M, Bäckhed F, Blaser MJ, Bushman FD, de  
426 Vos WM, Ehrlich SD, Fraser CM, Hattori M, Huttenhower C, Jeffery IB, Knights  
427 D, Lewis JD, Ley RE, Ochman H, O'Toole PW, Quince C, Relman DA, Shanahan  
428 F, Sunagawa S, Wang J, Weinstock GM, Wu GD, Zeller G, Zhao L, Raes J,  
429 Knight R, Bork P. 2018. Enterotypes in the landscape of gut microbial community  
430 composition. *Nat Microbiol* 3(1):8-16.

- 431 17. Sherwin E, Sandhu KV, Dinan TG, Cryan JF. 2016. May the force be with you:  
432 the light and dark sides of the microbiota-gut-brain axis in neuropsychiatry. *CNS*  
433 *Drugs* 30(11):1019-1041.
- 434 18. Kao YC, Ko CY, Wang SC, Liu YP. 2016. Protective effects of quetiapine on  
435 metabolic and inflammatory abnormalities in schizophrenic patients during  
436 exacerbated stage. *Chin J Physiol* 59(2):69-77.
- 437 19. Heizati M, Li N, Shao L, Yao X, Wang Y, Hong J, Zhou L, Zhang D, Chang G,  
438 Abulikemu S. 2017. Does increased serum d-lactate mean subclinical  
439 hyperpermeability of intestinal barrier in middle-aged nonobese males with OSA?  
440 *Medicine (Baltimore)* 96(49):e9144.
- 441 20. Grootjans J, Thuijls G, Verdam F, Derikx JP, Lenaerts K, Buurman WA. 2010.  
442 Non-invasive assessment of barrier integrity and function of the human gut.  
443 *World J Gastrointest Surg* 2:61-69.
- 444 21. Barceló A, Esquinas C, Robles J, Piérola J, De la Peña M, Aguilar I,  
445 Morell-Garcia D, Alonso A, Toledo N, Sánchez-de la Torre M, Barbé F. 2016.  
446 Gut epithelial barrier markers in patients with obstructive sleep apnea. *Sleep Med*  
447 26:12-15.
- 448 22. Maes M, Kubera M, Leunis JC. 2008. The gut-brain barrier in major depression:  
449 intestinal mucosal dysfunction with an increased translocation of LPS from gram  
450 negative enterobacteria (leaky gut) plays a role in the inflammatory  
451 pathophysiology of depression. *Neuro Endocrinol Lett* 29(1):117-124.

- 452 23. Tobias PS, Soldau K, Ulevitch RJ. 1989. Identification of a lipid A binding site in  
453 the acute phase reactant lipopolysaccharide binding protein. J Biol Chem  
454 264(18):10867-10871.
- 455 24. Ko CY, Liu YP. 2016. Disruptions of sensorimotor gating, cytokines, glycemia,  
456 monoamines, and genes in both sexes of rats reared in social isolation can be  
457 ameliorated by oral chronic quetiapine administration. Brain Behav Immun  
458 51:119-130.
- 459 25. Orlando A, Cazzaniga E, Giussani M, Palestini P, Genovesi S. 2018.  
460 Hypertension in children: Role of obesity, simple carbohydrates, and uric acid.  
461 Front Public Health 6:129.
- 462 26. Macfarlane GT, Macfarlane S. 2012. Bacteria, colonic fermentation, and  
463 gastrointestinal health. JAOAC Int 95(1):50-60.
- 464 27. Wang L, Christophersen CT, Sorich MJ, Gerber JP, Angley MT, Conlon MA.  
465 2013. Increased abundance of *Sutterella* spp. and *Ruminococcus* torques in feces  
466 of children with autism spectrum disorder. Mol Autism 4(1):42.
- 467 28. Morgenthaler TI, Kagramanov V, Hanak V, Decker PA. 2006. Complex sleep  
468 apnea syndrome: is it a unique clinical syndrome? Sleep 29:1203-1209.
- 469 29. Khan MT, Franco RA. 2014. Complex sleep apnea syndrome. Sleep Disord  
470 2014:798487.
- 471 30. Gay PC. 2008. Complex sleep apnea: it really is a disease. J Clin Sleep Med  
472 4(5):403-405.



- 473 31. Westhoff M, Arzt M, Litterst P. 2012. Prevalence and treatment of central sleep  
474 apnoea emerging after initiation of continuous positive airway pressure in  
475 patients with obstructive sleep apnoea without evidence of heart failure. *Sleep*  
476 *Breath* 16(1):71-78.
- 477 32. Killgore WD. 2010. Effects of sleep deprivation on cognition. *Prog Brain Res*  
478 185:105-129.
- 479 33. Zhan X, Fang F, Wu C, Pinto JM, Wei Y. 2018. A retrospective study to compare  
480 the use of the mean apnea-hypopnea duration and the apnea-hypopnea index with  
481 blood oxygenation and sleep patterns in patients with obstructive sleep apnea  
482 diagnosed by polysomnography. *Med Sci Monit* 4:1887-1893.

483 **Figures and tables captions**

484 **Figure 1. The faecal taxa of non-obstructive sleep apnoea–hypopnea syndrome**  
485 **(OSAHS) and OSAHS subjects of three enterotypes.**

486 Apnoea–hypopnea indices (AHI) < 15 as non-OSAHS, AHI ≥ 15 as OSAHS.

487 Enterotype 1: *Bacteroides*, Enterotype 2: *Ruminococcus*, Enterotype 3: *Prevotella*.

488

489 **Figure 2. Cytokines levels analysis in three enterotypes subjects.**

490 IL: interleukin, TNF: tumor necrosis factor.

491

492 **Table 1. Participant characteristics.**

493

494 **Table 2. Polysomnographic data analysis in three enterotypes subjects.**

495

496 **Table 3. Polysomnographic data analysis in three enterotypes of apnoea–**  
497 **hypopnea indices ≥ 15 patients.**

498

499 **Table 4. Polysomnographic data analysis in enterotypes of apnoea–hypopnea**  
500 **indices < 15 subjects.**

501

502 **Table 5. Polysomnographic data analysis in *Ruminococcus* enterotype subjects.**

503 AHI: apnoea–hypopnea indices. \* p<0.05, \*\* p<0.01 compared with AHI<15

504 subjects.

505

506 **Table 6. Polysomnographic data analysis in *Prevotella* enterotype subjects.**

507 AHI: apnoea–hypopnea indices. \*  $p < 0.05$ , \*\*  $p < 0.01$ , \*\*\*  $p < 0.001$  compared with

508 AHI < 15 subjects.

509

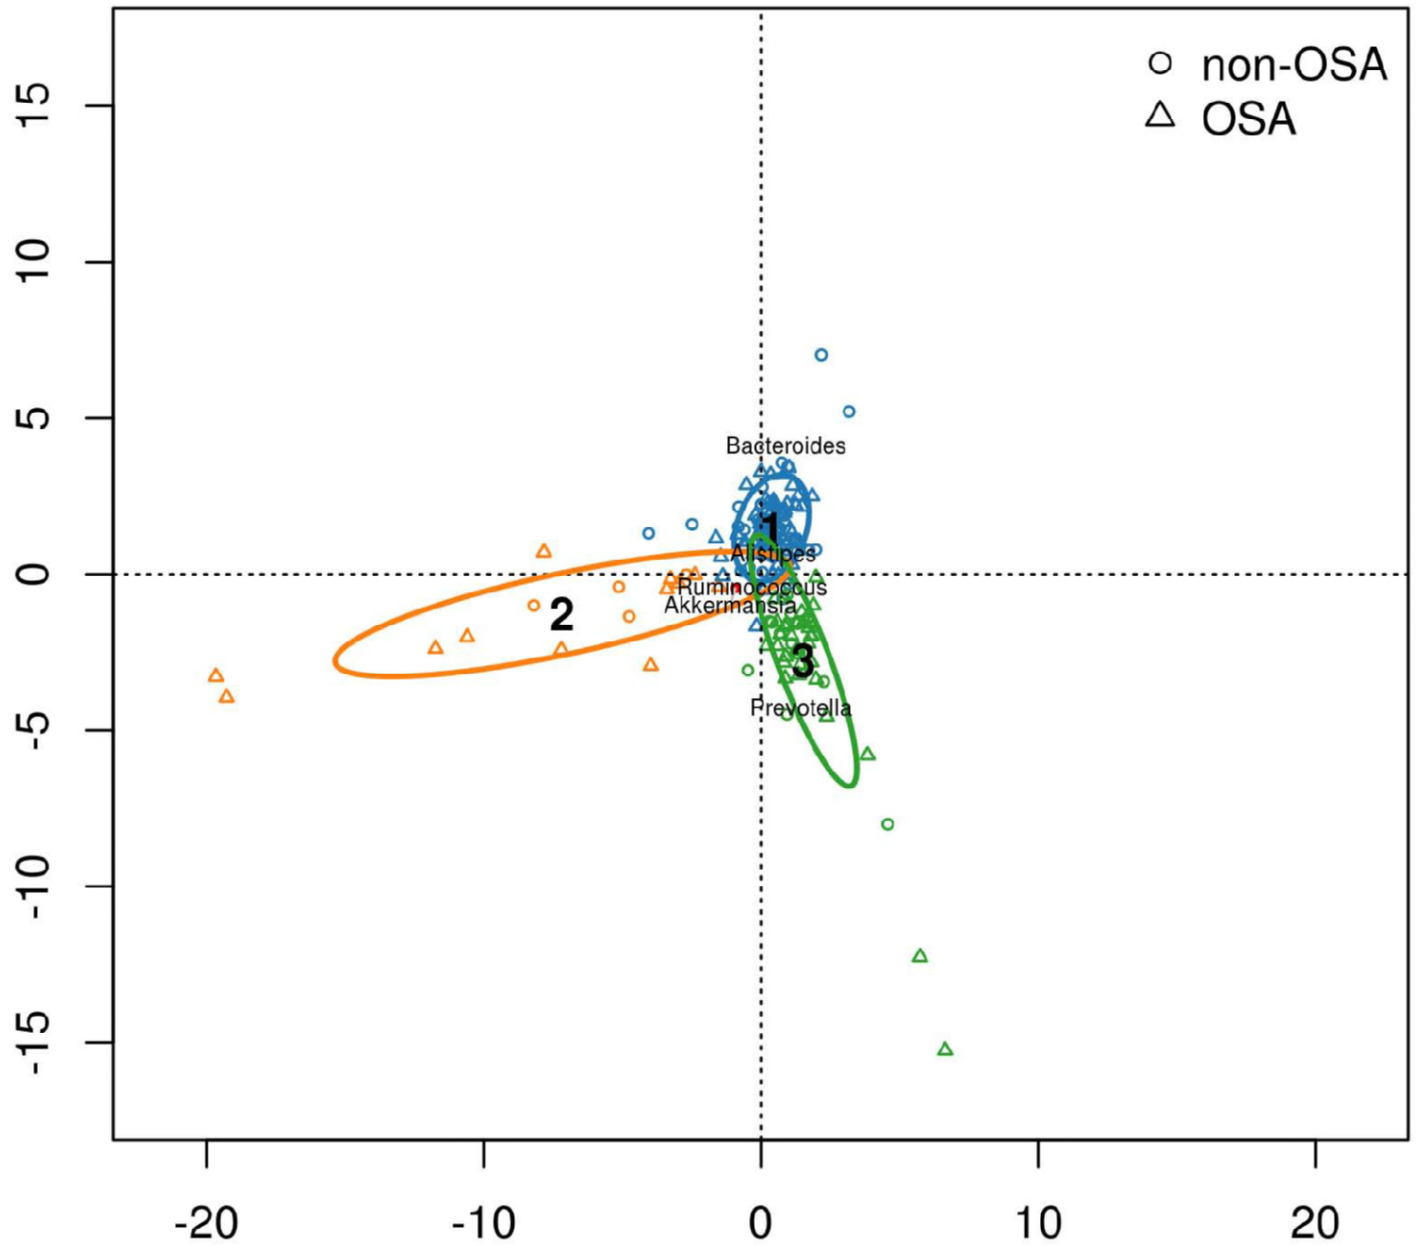

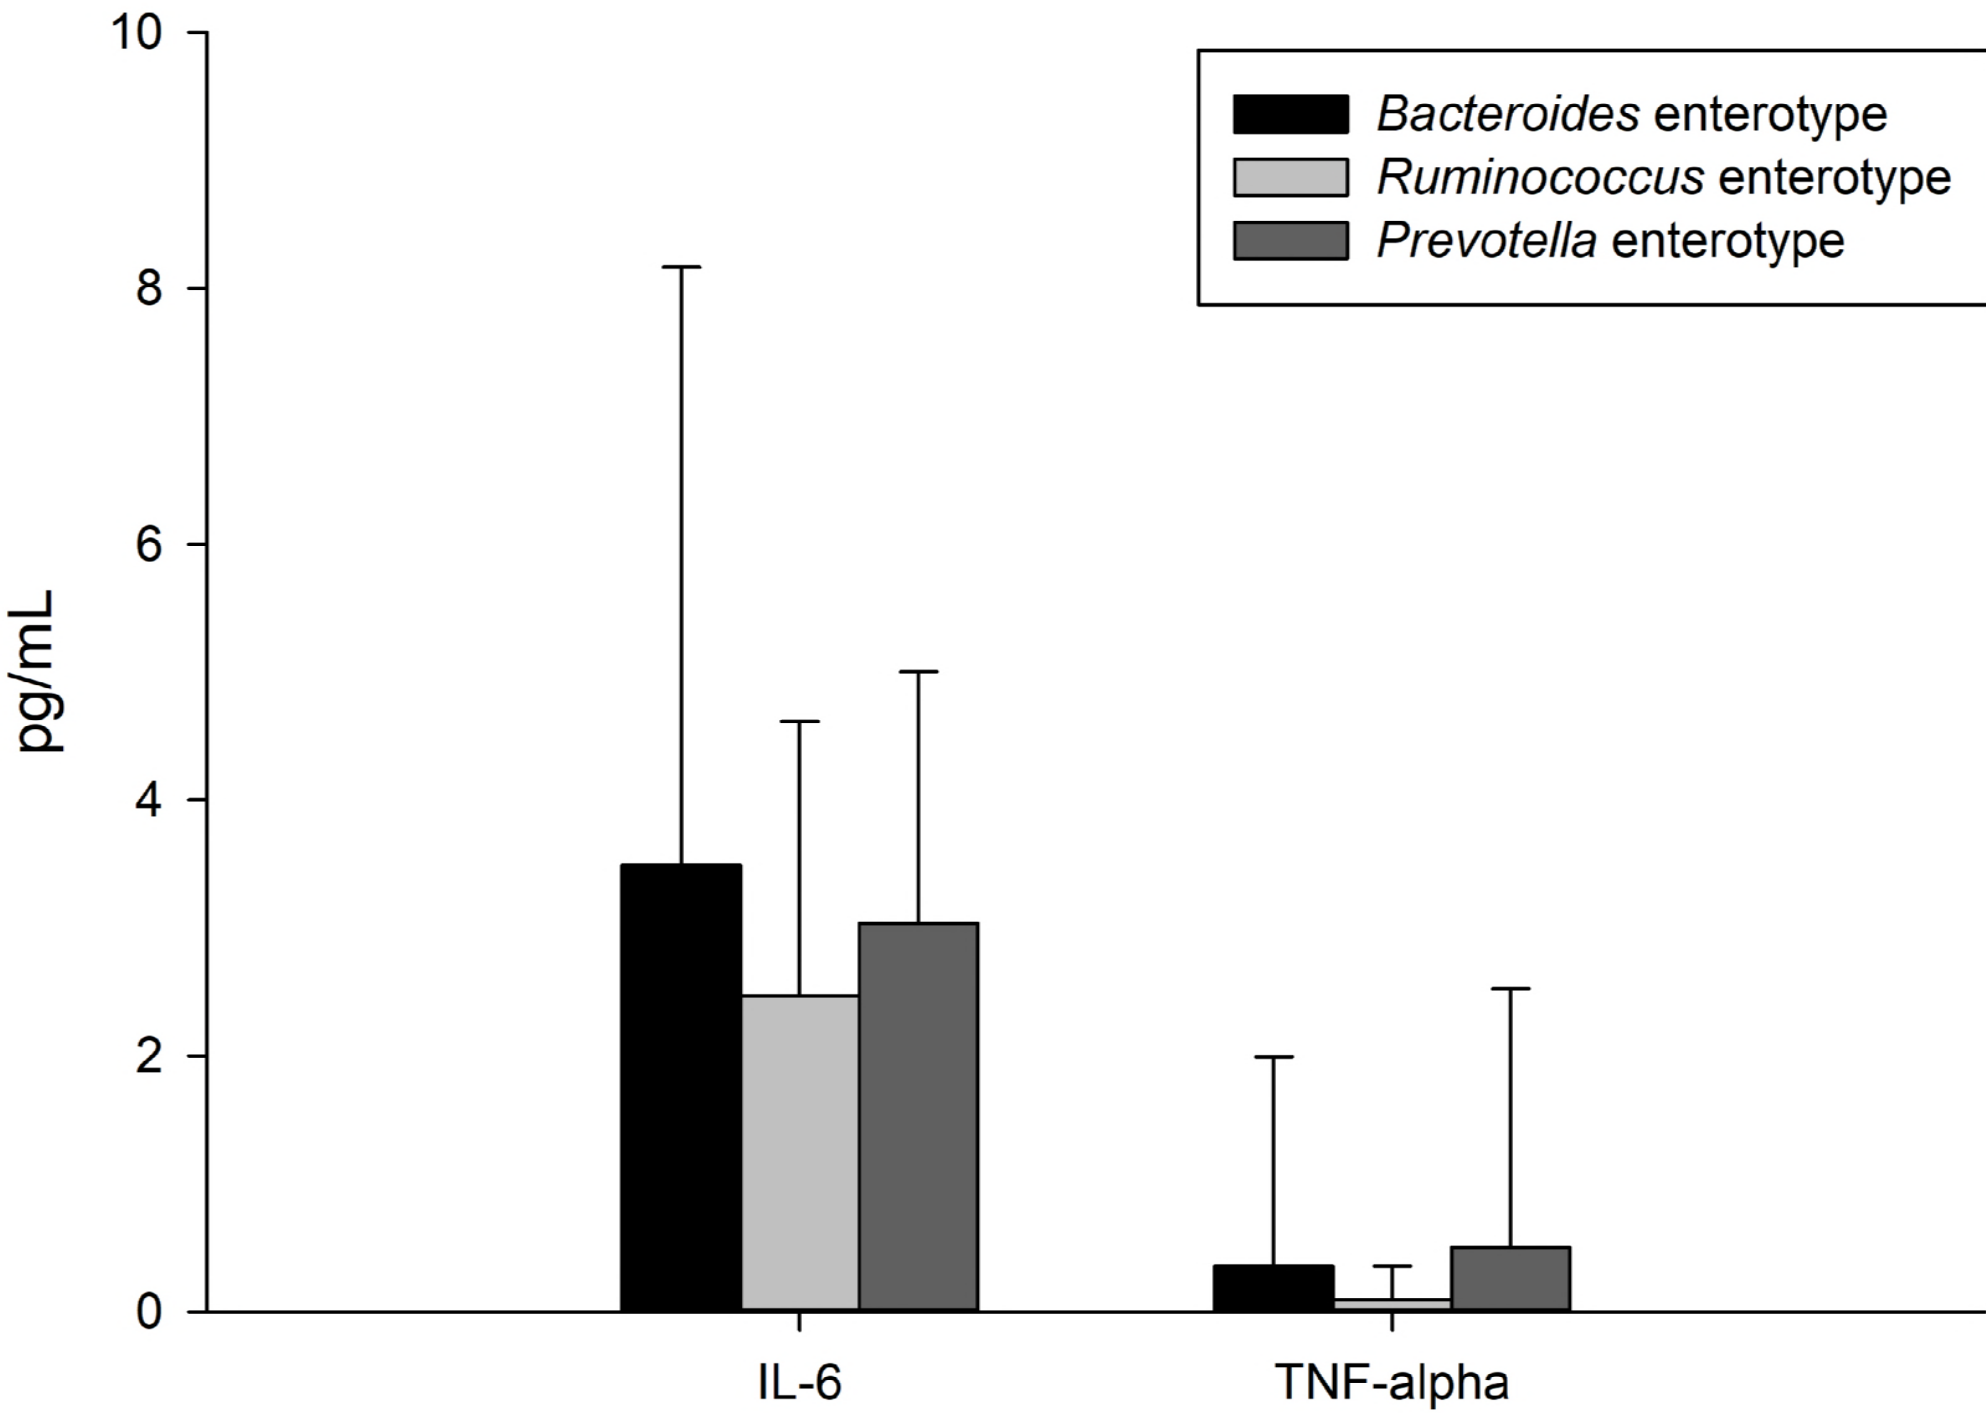

**Table 1.**

|                                       | <i>Bacteroides</i><br>enterotype<br>(n=73) | <i>Ruminococcus</i><br>enterotype<br>(n=14) | <i>Prevotella</i><br>enterotype<br>(n=26) |
|---------------------------------------|--------------------------------------------|---------------------------------------------|-------------------------------------------|
| Gender (male/female)                  | 61/12                                      | 11/3                                        | 20/6                                      |
| Age (years, mean $\pm$ SD)            | <b>40.89<math>\pm</math>10.56b</b>         | <b>53.14<math>\pm</math>14.37a</b>          | <b>44.58<math>\pm</math>13.51ab</b>       |
| Height (cm)                           | 166.28 $\pm$ 6.90a                         | 164.61 $\pm$ 7.30a                          | 166.83 $\pm$ 8.83a                        |
| Weight (kg)                           | 72.51 $\pm$ 14.31a                         | 71.62 $\pm$ 14.25a                          | 79.41 $\pm$ 13.70a                        |
| Body mass index (kg m <sup>-2</sup> ) | <b>26.11<math>\pm</math>3.87b</b>          | <b>26.44<math>\pm</math>5.50ab</b>          | <b>28.73<math>\pm</math>5.27a</b>         |
| Waist circumference (cm)              | 90.77 $\pm$ 9.87a                          | 91.21 $\pm$ 13.33a                          | 96.54 $\pm$ 12.27a                        |
| Hip circumference (cm)                | <b>96.95<math>\pm</math>6.03b</b>          | <b>97.75<math>\pm</math>10.42ab</b>         | <b>103.21<math>\pm</math>8.97a</b>        |
| Waist-to-hip ratio                    | 0.94 $\pm$ 0.07a                           | 0.93 $\pm$ 0.06a                            | 0.93 $\pm$ 0.06a                          |

**Table****2.**

|                                      | <i>Bacteroides</i><br>enterotype<br>(n=73) | <i>Ruminococcus</i><br>enterotype<br>(n=14) | <i>Prevotella</i><br>enterotype<br>(n=26) |
|--------------------------------------|--------------------------------------------|---------------------------------------------|-------------------------------------------|
| Total sleep time (min)               | 389.01±99.14a                              | 362.77±120.12a                              | 429.64±119.1a                             |
| N1 sleep stage (min)                 | 138.56±66.92a                              | 152.04±82.37a                               | 171.62±96.22a                             |
| N1 sleep stage (%)                   | 36.10±15.90a                               | 42.19±14.54a                                | 39.76±17.28a                              |
| N2 sleep stage (min)                 | 111.30±60.67a                              | 85.85±44.25a                                | 111.94±57.67a                             |
| N2 sleep stage (%)                   | 28.10±11.99a                               | 24.45±9.62a                                 | 25.86±10.48a                              |
| N3 sleep stage (min)                 | 71.91±36.85a                               | 57.71±45.99a                                | 66.44±41.66a                              |
| N3 sleep stage (%)                   | 18.33±8.29a                                | 15.95±10.23a                                | 16.25±9.79a                               |
| Non-rapid-eye movement (NREM) (min)  | 321.79±87.88a                              | 295.60±96.74a                               | 350.01±98.5a                              |
| NREM (%)                             | 82.56±10.84a                               | 82.57±7.62a                                 | 81.87±9.88a                               |
| Rapid-eye movement (REM) (min)       | 67.21±43.27a                               | 67.17±37.26a                                | 79.63±44.02a                              |
| REM (%)                              | 17.43±10.84a                               | 17.42±7.62a                                 | 18.12±9.88a                               |
| Sleep efficiency (%)                 | 70.40±14.99a                               | 64.62±21.45a                                | 75.92±18.36a                              |
| Sleep latency                        | 31.0±29.96a                                | 31.70±29.97a                                | 18.93±20.36a                              |
| Wake after sleep onset               | 129.91±71.69a                              | 174.76±116.12a                              | 110.50±98.33a                             |
| Arousal time (min)                   | 157.64±78.71a                              | 202.23±131.03a                              | 128.14±100.46a                            |
| Arousal times                        | 20.35±11.57a                               | 19.64±12.70a                                | 14.50±9.36a                               |
| Arousal index (events/h)             | 3.34±2.06a                                 | 3.86±3.19a                                  | 2.30±1.68a                                |
| Arousal time in REM                  | 39.93±38.94a                               | 39.42±34.74a                                | 52.00±36.13a                              |
| Arousal index in REM                 | 32.25±16.44a                               | 29.52±17.66a                                | 38.96±16.29a                              |
| Arousal time in NREM                 | 210.15±126.03a                             | 209.57±148.79a                              | 288.19±226.67a                            |
| Arousal index in NREM                | 38.17±15.54a                               | 39.98±16.20a                                | 45.76±26.09a                              |
| Total sleep arousal times            | 250.08±136.58a                             | 249.00±166.24a                              | 340.19±249.89a                            |
| Total sleep arousal index            | 38.06±15.18a                               | 38.75±15.83a                                | 44.64±24.15a                              |
| Apnea-hypopnea index (events/h)      | 19.63±21.42a                               | 27.90±22.63a                                | 27.41±30.96a                              |
| Apnea-hypopnea times                 | 132.19±170.66a                             | 180.50±176.90a                              | 221.34±278.37a                            |
| Obstructive apnea index (events/h)   | 8.85±15.04a                                | 10.88±12.44a                                | 10.62±16.09a                              |
| Obstructive apnea times              | 62.78±120.68a                              | 71.28±102.99a                               | 85.26±134.75a                             |
| Central apnea index (events/h)       | 0.46±1.29a                                 | 2.75±8.64a                                  | 1.92±4.04a                                |
| Central apnea times                  | <b>3.39±9.45b</b>                          | <b>11.78±31.62ab</b>                        | <b>17.5±40.21a</b>                        |
| Mixed apnea index (events/h)         | <b>0.59±1.52b</b>                          | <b>1.61±3.80ab</b>                          | <b>2.88±6.79a</b>                         |
| Mixed apnea times                    | <b>4.56±13.25b</b>                         | <b>10.5±27.95ab</b>                         | <b>25.73±64.8a</b>                        |
| Hypopnea index (events/h)            | 9.71±8.95a                                 | 12.63±17.71a                                | 11.98±14.29a                              |
| Hypopnea times                       | 61.45±55.31a                               | 86.92±136.55a                               | 92.84±125.09a                             |
| Longest apnea time (s)               | 37.80±23.24a                               | 46.64±27.65a                                | 45.26±38.39a                              |
| Mean apnea-hypopnea duration (s)     | 19.55±8.98a                                | 20.25±8.28a                                 | 20.01±9.78a                               |
| Longest hypopnea time (s)            | 68.26±33.06a                               | 66.85±27.29a                                | 78.50±32.89a                              |
| Average hypopnea time (s)            | 28.30±9.95a                                | 29.75±12.62a                                | 31.52±8.38a                               |
| Oxygen desaturation index (events/h) | 18.72±20.79a                               | 25.22±23.56a                                | 25.9±29.82a                               |
| Lowest oxygen saturation (%)         | 82.26±8.81a                                | 79.35±9.34a                                 | 82.23±10.88a                              |
| Average oxygen saturation (%)        | 94.34±2.04a                                | 93.92±3.34a                                 | 94.15±2.66a                               |

|                                            |               |               |               |
|--------------------------------------------|---------------|---------------|---------------|
| Longest oxygen desaturation (s)            | 109.16±42.98a | 95.17±28.61a  | 99.51±40.54a  |
| Mean heart rate                            | 65.95±10.32a  | 65.00±7.93a   | 63.73±9.55a   |
| Arrhythmia index (events/h)                | 12.89±54.36a  | 38.04±134.47a | 4.23±8.19a    |
| Maximum heart rate                         | 99.41±15.06a  | 97.28±12.19a  | 96.92±16.70a  |
| Minimum heart rate                         | 51.67±8.97a   | 53.28±5.21a   | 51.53±6.68a   |
| Blood pressure elevation index (events/h)  | 13.22±15.21a  | 16.43±15.52a  | 16.58±22.43a  |
| The highest systolic blood pressure (mmHg) | 157.98±39.08a | 148.57±58.14a | 158.80±45.51a |
| Average systolic blood pressure (mmHg)     | 120.41±25.98a | 113.78±42.26a | 118.19±28.64a |
| Average diastolic blood pressure (mmHg)    | 81.80±16.05a  | 77.21±24.46a  | 82.92±21.59a  |

---



**Table****3.**

|                                      | <i>Bacteroides</i><br>enterotype<br>(n=32) | <i>Ruminococcus</i><br>enterotype<br>(n=8) | <i>Prevotella</i><br>enterotype<br>(n=12) |
|--------------------------------------|--------------------------------------------|--------------------------------------------|-------------------------------------------|
| Total sleep time (min)               | 392.92±106.21a                             | 387.61±116.85a                             | 460.69±117.35a                            |
| N1 sleep stage (min)                 | <b>162.46±71.21b</b>                       | <b>159.70±98.14ab</b>                      | <b>236.23±102.31a</b>                     |
| N1 sleep stage (%)                   | 41.93±15.78a                               | 41.18±17.37a                               | 50.03±16.75a                              |
| N2 sleep stage (min)                 | 111.86±65.07a                              | 95.24±48.56a                               | 101.92±56.09a                             |
| N2 sleep stage (%)                   | 27.65±11.46a                               | 24.23±8.41a                                | 22.03±9.76a                               |
| N3 sleep stage (min)                 | 61.95±35.56a                               | 63.06±55.27a                               | 45.71±37.88a                              |
| N3 sleep stage (%)                   | 15.61±7.96a                                | 16.54±12.79a                               | 9.90±7.97a                                |
| Non-rapid-eye movement (NREM) (min)  | 336.27±92.94a                              | 318.00±102.04a                             | 383.86±111.29a                            |
| NREM (%)                             | 85.20±10.65a                               | 81.94±5.83a                                | 81.96±10.05a                              |
| Rapid-eye movement (REM) (min)       | 56.65±38.27a                               | 69.61±33.06a                               | 76.83±29.52a                              |
| REM (%)                              | 14.80±10.65a                               | 18.06±5.83a                                | 18.04±10.05a                              |
| Sleep efficiency (%)                 | 70.68±15.53a                               | 68.66±19.05a                               | 81.52±16.78a                              |
| Sleep latency                        | <b>28.21±26.64a</b>                        | <b>26.26±15.89ab</b>                       | <b>7.93±5.48b</b>                         |
| Wake after sleep onset               | 131.92±74.80a                              | 156.49±119.11a                             | 77.79±46.87a                              |
| Arousal time (min)                   | <b>156.51±76.52a</b>                       | <b>177.55±118.32a</b>                      | <b>84.31±48.77b</b>                       |
| Arousal times                        | 19.34±12.06a                               | 19.75±14.53a                               | 12.50±10.70a                              |
| Arousal index (events/h)             | 3.35±2.52a                                 | 3.89±4.09a                                 | 1.89±1.83a                                |
| Arousal time in REM                  | <b>34.81±29.91b</b>                        | <b>43.00±34.32ab</b>                       | <b>66.67±39.80a</b>                       |
| Arousal index in REM                 | <b>33.37±18.93b</b>                        | <b>34.26±17.70ab</b>                       | <b>50.00±13.49a</b>                       |
| Arousal time in NREM                 | <b>260.28±152.59b</b>                      | <b>262.13±178.51ab</b>                     | <b>433.25±262.42a</b>                     |
| Arousal index in NREM                | 45.67±17.02a                               | 46.20±18.56a                               | 63.53±28.16a                              |
| Total sleep arousal times            | <b>295.09±160.4b</b>                       | <b>305.13±194.43ab</b>                     | <b>499.92±285.72a</b>                     |
| Total sleep arousal index            | <b>44.99±16.94b</b>                        | <b>44.41±18.55b</b>                        | <b>61.68±25.41a</b>                       |
| Apnea-hypopnea index (events/h)      | 36.39±22.86a                               | 42.04±19.98a                               | 52.53±29.78a                              |
| Apnea-hypopnea times                 | 247.09±204.93a                             | 278.88±176.82a                             | 430.58±294.38a                            |
| Obstructive apnea index (events/h)   | 18.03±19.14a                               | 14.43±15.52a                               | 21.38±18.74a                              |
| Obstructive apnea times              | 129.47±159.54a                             | 99.88±129.97a                              | 173.25±159.52a                            |
| Central apnea index (events/h)       | 0.98±1.83a                                 | 4.81±11.28a                                | 3.83±5.40a                                |
| Central apnea times                  | <b>7.09±13.44b</b>                         | <b>20.63±40.61ab</b>                       | <b>35.50±54.65a</b>                       |
| Mixed apnea index (events/h)         | <b>1.31±2.10b</b>                          | <b>2.78±4.81ab</b>                         | <b>6.19±9.08a</b>                         |
| Mixed apnea times                    | <b>10.13±18.71b</b>                        | <b>18.13±36.00ab</b>                       | <b>55.33±88.13a</b>                       |
| Hypopnea index (events/h)            | 16.08±9.56a                                | 19.99±20.79a                               | 21.17±16.88a                              |
| Hypopnea times                       | 100.41±57.37a                              | 140.25±163.59a                             | 166.50±155.08a                            |
| Longest apnea time (s)               | 50.31±19.59a                               | 47.63±29.34a                               | 69.08±38.55a                              |
| Mean apnea-hypopnea duration (s)     | 23.20±6.35a                                | 20.30±6.90a                                | 26.97±7.53a                               |
| Longest hypopnea time (s)            | 82.69±28.53a                               | 70.25±25.97a                               | 99.75±24.15a                              |
| Average hypopnea time (s)            | 31.29±6.58a                                | 28.53±6.55a                                | 35.74±8.24a                               |
| Oxygen desaturation index (events/h) | 34.23±22.94a                               | 38.98±22.58a                               | 49.73±29.24a                              |
| Lowest oxygen saturation (%)         | 76.31±9.20a                                | 76.00±10.01a                               | 74.83±12.04a                              |
| Average oxygen saturation (%)        | 93.31±2.32a                                | 93.13±4.09a                                | 92.50±2.81a                               |

|                                            |               |               |               |
|--------------------------------------------|---------------|---------------|---------------|
| Longest oxygen desaturation (s)            | 113.18±37.43a | 103.39±23.54a | 92.93±26.57a  |
| Mean heart rate                            | 66.56±10.38a  | 67.25±6.67a   | 67.83±10.83a  |
| Arrhythmia index (events/h)                | 5.29±13.97a   | 65.06±177.85a | 3.82±5.03a    |
| Maximum heart rate                         | 99.09±14.79a  | 99.75±15.64a  | 103.08±18.70a |
| Minimum heart rate                         | 51.88±7.07a   | 54.50±4.44a   | 53.50±6.56a   |
| Blood pressure elevation index (events/h)  | 20.91±18.96a  | 20.44±18.45a  | 26.09±27.79a  |
| The highest systolic blood pressure (mmHg) | 172.97±35.54a | 180.75±38.26a | 163.25±62.49a |
| Average systolic blood pressure (mmHg)     | 130.44±22.64a | 138.50±22.91a | 117.58±41.10a |
| Average diastolic blood pressure (mmHg)    | 87.28±13.38a  | 88.00±9.94a   | 84.25±29.45a  |

---

**Table 4.**

|                                      | <i>Bacteroides</i><br>enterotype<br>(n=41) | <i>Ruminococcus</i><br>enterotype<br>(n=6) | <i>Prevotella</i><br>enterotype<br>(n=14) |
|--------------------------------------|--------------------------------------------|--------------------------------------------|-------------------------------------------|
| Total sleep time (min)               | 385.96±94.49a                              | 329.65±126.87a                             | 403.04±118.21a                            |
| N1 sleep stage (min)                 | 119.91±57.60a                              | 141.83±62.74a                              | 116.25±42.34a                             |
| N1 sleep stage (%)                   | 31.55±14.61a                               | 43.55±11.10a                               | 30.96±12.49a                              |
| N2 sleep stage (min)                 | 110.88±57.82a                              | 73.33±38.22a                               | 120.54±59.68a                             |
| N2 sleep stage (%)                   | 28.47±12.52a                               | 24.77±11.88a                               | 29.15±10.26a                              |
| N3 sleep stage (min)                 | 79.70±36.37a                               | 50.58±33.42a                               | 84.21±37.23a                              |
| N3 sleep stage (%)                   | 20.47±8.01a                                | 15.17±6.46a                                | 21.70±7.83a                               |
| Non-rapid-eye movement (NREM) (min)  | 310.49±83.12a                              | 265.73±88.78a                              | 321.00±78.85a                             |
| NREM (%)                             | 80.51±10.68a                               | 83.42±10.10a                               | 81.80±10.11a                              |
| Rapid-eye movement (REM) (min)       | 75.47±45.56a                               | 63.92±45.35a                               | 82.04±54.54a                              |
| REM (%)                              | 19.49±10.67a                               | 16.58±10.10a                               | 18.20±10.11a                              |
| Sleep efficiency (%)                 | 70.20±14.75a                               | 59.23±25.03a                               | 71.13±18.87a                              |
| Sleep latency                        | 33.20±32.47a                               | 38.95±43.26a                               | 28.36±23.75a                              |
| Wake after sleep onset               | 128.36±70.05a                              | 199.13±118.10a                             | 138.54±122.07a                            |
| Arousal time (min)                   | 158.52±81.32a                              | 235.15±150.88a                             | 165.71±118.75a                            |
| Arousal times                        | 21.15±11.26a                               | 19.50±11.13a                               | 16.21±8.06a                               |
| Arousal index (events/h)             | 3.35±1.66a                                 | 3.83±1.75a                                 | 2.66±1.52a                                |
| Arousal time in REM                  | 43.93±44.70a                               | 34.67±37.97a                               | 39.43±28.30a                              |
| Arousal index in REM                 | 31.39±14.39a                               | 23.20±16.99a                               | 29.50±12.13a                              |
| Arousal time in NREM                 | 171.02±83.45a                              | 139.50±51.31a                              | 163.86±66.82a                             |
| Arousal index in NREM                | 32.33±11.41a                               | 31.70±7.47a                                | 30.54±9.82a                               |
| Total sleep arousal times            | 214.95±103.70a                             | 174.17±84.67a                              | 203.29±85.31a                             |
| Total sleep arousal index            | 32.66±11.13a                               | 31.20±7.07a                                | 30.04±8.81a                               |
| Apnea-hypopnea index (events/h)      | 6.56±4.54a                                 | 9.07±5.20a                                 | 5.88±3.43a                                |
| Apnea-hypopnea times                 | 42.51±32.76a                               | 49.33±38.24a                               | 42.00±25.31a                              |
| Obstructive apnea index (events/h)   | <b>1.70±1.93b</b>                          | <b>6.17±4.27a</b>                          | <b>1.41±1.65b</b>                         |
| Obstructive apnea times              | <b>10.73±12.29b</b>                        | <b>33.17±29.64a</b>                        | <b>9.86±10.79b</b>                        |
| Central apnea index (events/h)       | 0.07±0.15a                                 | 0.00±0.00a                                 | 0.30±0.77a                                |
| Central apnea times                  | 0.51±1.14a                                 | 0.00±0.00a                                 | 2.07±5.14a                                |
| Mixed apnea index (events/h)         | 0.03±0.11a                                 | 0.07±0.10a                                 | 0.05±0.09a                                |
| Mixed apnea times                    | 0.22±0.72a                                 | 0.33±0.52a                                 | 0.36±0.63a                                |
| Hypopnea index (events/h)            | 4.75±3.94a                                 | 2.83±2.95a                                 | 4.11±2.65a                                |
| Hypopnea times                       | 31.05±28.19a                               | 15.83±20.05a                               | 29.71±21.00a                              |
| Longest apnea time (s)               | 28.05±21.26a                               | 45.33±27.91a                               | 24.86±24.59a                              |
| Mean apnea-hypopnea duration (s)     | 16.70±9.74a                                | 20.18±10.58a                               | 14.06±7.29a                               |
| Longest hypopnea time (s)            | 57.00±32.26a                               | 62.33±30.81a                               | 60.29±28.51a                              |
| Average hypopnea time (s)            | 25.97±11.49a                               | 31.40±18.67a                               | 27.91±6.86a                               |
| Oxygen desaturation index (events/h) | 6.63±5.30a                                 | 6.90±4.88a                                 | 5.48±3.66a                                |
| Lowest oxygen saturation (%)         | 86.9±4.88a                                 | 83.83±6.68a                                | 88.57±3.34a                               |

|                                            |                       |                     |                      |
|--------------------------------------------|-----------------------|---------------------|----------------------|
| Average oxygen saturation (%)              | 95.15±1.35a           | 95.00±1.79a         | 95.57±1.51a          |
| Longest oxygen desaturation (s)            | 106.03±47.08a         | 84.23±33.17a        | 105.15±49.88a        |
| Mean heart rate                            | 65.49±10.37a          | 62.00±9.08a         | 60.21±6.89a          |
| Arrhythmia index (events/h)                | 18.83±71.31a          | 2.02±2.09a          | 4.60±10.36a          |
| Maximum heart rate                         | 99.66±15.44a          | 94.00±4.60a         | 91.64±13.25a         |
| Minimum heart rate                         | 51.51±10.30a          | 51.67±6.12a         | 49.86±6.54a          |
| Blood pressure elevation index (events/h)  | 7.23±7.34a            | 11.10±9.49a         | 8.44±12.61a          |
| The highest systolic blood pressure (mmHg) | <b>146.29±38.09ab</b> | <b>105.67±53.6b</b> | <b>155.00±25.4a</b>  |
| Average systolic blood pressure (mmHg)     | <b>112.59±25.97a</b>  | <b>80.83±40.36b</b> | <b>118.71±12.14a</b> |
| Average diastolic blood pressure (mmHg)    | 77.54±16.80a          | 62.83±31.35a        | 81.79±12.63a         |

**Table 5.**

|                                      | AHI < 15           | AHI ≥ 15               |
|--------------------------------------|--------------------|------------------------|
| Total sleep time (min)               | 329.65±126.87      | 387.61±116.85          |
| N1 sleep stage (min)                 | 141.83±62.74       | 159.70±98.14           |
| N1 sleep stage (%)                   | 43.55±11.10        | 41.18±17.37            |
| N2 sleep stage (min)                 | 73.33±38.22        | 95.24±48.56            |
| N2 sleep stage (%)                   | 24.77±11.88        | 24.23±8.41             |
| N3 sleep stage (min)                 | 50.58±33.42        | 63.06±55.27            |
| N3 sleep stage (%)                   | 15.17±6.46         | 16.54±12.79            |
| Non-rapid-eye movement (NREM) (min)  | 265.73±88.78       | 318.00±102.04          |
| NREM (%)                             | 83.42±10.10        | 81.94±5.83             |
| Rapid-eye movement (REM) (min)       | 63.92±45.35        | 69.61±33.06            |
| REM (%)                              | 16.58±10.10        | 18.06±5.83             |
| Sleep efficiency (%)                 | 59.23±25.03        | 68.66±19.05            |
| Sleep latency                        | 38.95±43.26        | 26.26±15.89            |
| Wake after sleep onset               | 199.13±118.10      | 156.49±119.11          |
| Arousal time (min)                   | 235.15±150.88      | 177.55±118.32          |
| Arousal times                        | 19.50±11.13        | 19.75±14.53            |
| Arousal index (events/h)             | 3.83±1.75          | 3.89±4.09              |
| Arousal time in REM                  | 34.67±37.97        | 43.00±34.32            |
| Arousal index in REM                 | 23.20±16.99        | 34.26±17.70            |
| Arousal time in NREM                 | 139.50±51.31       | 262.13±178.51          |
| Arousal index in NREM                | 31.70±7.47         | 46.20±18.56            |
| Total sleep arousal times            | 174.17±84.67       | 305.13±194.43          |
| Total sleep arousal index            | 31.20±7.07         | 44.41±18.55            |
| Apnea-hypopnea index (events/h)      | <b>9.07±5.20</b>   | <b>42.04±19.98**</b>   |
| Apnea-hypopnea times                 | <b>49.33±38.24</b> | <b>278.88±176.82**</b> |
| Obstructive apnea index (events/h)   | 6.17±4.27          | 14.43±15.52            |
| Obstructive apnea times              | 33.17±29.64        | 99.88±129.97           |
| Central apnea index (events/h)       | 0.00±0.00          | 4.81±11.28             |
| Central apnea times                  | 0.00±0.00          | 20.63±40.61            |
| Mixed apnea index (events/h)         | 0.07±0.10          | 2.78±4.81              |
| Mixed apnea times                    | 0.33±0.52          | 18.13±36.00            |
| Hypopnea index (events/h)            | 2.83±2.95          | 19.99±20.79            |
| Hypopnea times                       | 15.83±20.05        | 140.25±163.59          |
| Longest apnea time (s)               | 45.33±27.90        | 47.63±29.34            |
| Mean apnea-hypopnea duration (s)     | 20.18±10.58        | 20.30±6.90             |
| Longest hypopnea time (s)            | 62.33±30.81        | 70.25±25.97            |
| Average hypopnea time (s)            | 31.40±18.67        | 28.53±6.55             |
| Oxygen desaturation index (events/h) | <b>6.90±4.88</b>   | <b>38.98±22.58**</b>   |

|                                            |                     |                       |
|--------------------------------------------|---------------------|-----------------------|
| Lowest oxygen saturation (%)               | 83.83±6.68          | 76.00±10.01           |
| Average oxygen saturation (%)              | 95.00±1.79          | 93.13±4.09            |
| Longest oxygen desaturation (s)            | 84.23±33.17         | 103.39±23.54          |
| Mean heart rate                            | 62.00±9.08          | 67.25±6.67            |
| Arrhythmia index (events/h)                | 2.02±2.09           | 65.06±177.85          |
| Maximum heart rate                         | 94.00±4.60          | 99.75±15.64           |
| Minimum heart rate                         | 51.67±6.12          | 54.50±4.44            |
| Blood pressure elevation index (events/h)  | 11.10±9.49          | 20.44±18.45           |
| The highest systolic blood pressure (mmHg) | <b>105.67±53.60</b> | <b>180.75±38.26*</b>  |
| Average systolic blood pressure (mmHg)     | <b>80.83±40.36</b>  | <b>138.50±22.91**</b> |
| Average diastolic blood pressure (mmHg)    | 62.83±31.35         | 88.00±9.94            |

---

**Table 6.**

|                                      | AHI < 15             | AHI ≥ 15               |
|--------------------------------------|----------------------|------------------------|
| Total sleep time (min)               | 403.04±118.21        | 460.69±117.35          |
| N1 sleep stage (min)                 | <b>116.25±42.34</b>  | <b>236.23±102.31**</b> |
| N1 sleep stage (%)                   | <b>30.96±12.49</b>   | <b>50.03±16.75**</b>   |
| N2 sleep stage (min)                 | 120.54±59.68         | 101.92±56.09           |
| N2 sleep stage (%)                   | 29.15±10.26          | 22.03±9.76             |
| N3 sleep stage (min)                 | <b>84.21±37.23</b>   | <b>45.71±37.88*</b>    |
| N3 sleep stage (%)                   | <b>21.70±7.83</b>    | <b>9.90±7.97**</b>     |
| Non-rapid-eye movement (NREM) (min)  | 321.00±78.85         | 383.86±111.29          |
| NREM (%)                             | 81.80±10.11          | 81.96±10.05            |
| Rapid-eye movement (REM) (min)       | 82.04±54.54          | 76.83±29.52            |
| REM (%)                              | 18.20±10.11          | 18.04±10.05            |
| Sleep efficiency (%)                 | 71.13±18.87          | 81.52±16.78            |
| Sleep latency                        | <b>28.36±23.75</b>   | <b>7.93±5.48**</b>     |
| Wake after sleep onset               | 138.54±122.07        | 77.79±46.87            |
| Arousal time (min)                   | <b>165.71±118.75</b> | <b>84.31±48.77*</b>    |
| Arousal times                        | 16.21±8.06           | 12.50±10.70            |
| Arousal index (events/h)             | 2.66±1.52            | 1.89±1.83              |
| Arousal time in REM                  | 39.43±28.30          | 66.67±39.80            |
| Arousal index in REM                 | <b>29.50±12.13</b>   | <b>50.00±13.49***</b>  |
| Arousal time in NREM                 | <b>163.86±66.82</b>  | <b>433.25±262.42**</b> |
| Arousal index in NREM                | <b>30.54±9.82</b>    | <b>63.53±28.16**</b>   |
| Total sleep arousal times            | <b>203.29±85.31</b>  | <b>499.92±285.72**</b> |
| Total sleep arousal index            | <b>30.04±8.81</b>    | <b>61.68±25.41**</b>   |
| Apnea-hypopnea index (events/h)      | <b>5.88±3.43</b>     | <b>52.53±29.78***</b>  |
| Apnea-hypopnea times                 | <b>42.00±25.31</b>   | <b>430.58±294.38**</b> |
| Obstructive apnea index (events/h)   | <b>1.41±1.65</b>     | <b>21.38±18.74**</b>   |
| Obstructive apnea times              | <b>9.86±10.79</b>    | <b>173.25±159.52**</b> |
| Central apnea index (events/h)       | <b>0.30±0.77</b>     | <b>3.83±5.40*</b>      |
| Central apnea times                  | 2.07±5.14            | 35.50±54.65            |
| Mixed apnea index (events/h)         | <b>0.05±0.09</b>     | <b>6.19±9.08*</b>      |
| Mixed apnea times                    | 0.36±0.63            | 55.33±88.13            |
| Hypopnea index (events/h)            | <b>4.11±2.65</b>     | <b>21.17±16.88**</b>   |
| Hypopnea times                       | <b>29.71±21.00</b>   | <b>166.50±155.08**</b> |
| Longest apnea time (s)               | <b>24.86±24.59</b>   | <b>69.08±38.55**</b>   |
| Mean apnea-hypopnea duration (s)     | <b>14.06±7.29</b>    | <b>26.97±7.53***</b>   |
| Longest hypopnea time (s)            | <b>60.29±28.51</b>   | <b>99.75±24.15**</b>   |
| Average hypopnea time (s)            | <b>27.91±6.86</b>    | <b>35.74±8.24*</b>     |
| Oxygen desaturation index (events/h) | <b>5.48±3.66</b>     | <b>49.73±29.24***</b>  |

|                                            |                   |                       |
|--------------------------------------------|-------------------|-----------------------|
| Lowest oxygen saturation (%)               | <b>88.57±3.34</b> | <b>74.83±12.04***</b> |
| Average oxygen saturation (%)              | <b>95.00±1.79</b> | <b>92.50±2.81**</b>   |
| Longest oxygen desaturation (s)            | 84.23±33.17       | 92.93±26.57           |
| Mean heart rate                            | <b>62.00±9.08</b> | <b>67.83±10.83*</b>   |
| Arrhythmia index (events/h)                | 2.02±2.09         | 3.82±5.03             |
| Maximum heart rate                         | 94.00±4.60        | 103.08±18.70          |
| Minimum heart rate                         | 51.67±6.12        | 53.50±6.56            |
| Blood pressure elevation index (events/h)  | 11.10±9.49        | 26.09±27.79           |
| The highest systolic blood pressure (mmHg) | 105.67±53.60      | 163.25±62.49          |
| Average systolic blood pressure (mmHg)     | 80.83±40.36       | 117.58±41.10          |
| Average diastolic blood pressure (mmHg)    | 62.83±31.35       | 84.25±29.45           |

---
